# Supplementary material for: A Vaccine with Multiple Receptor-Binding Domain Subunit Mutations Induces Broad-Spectrum Immune Response against SARS-CoV-2 Variants of Concern
Source: MDPI journal article supplement (doi:10.3390/vaccines10101653), 2022-10-01
Supplement: s1 [file s1]

## SUPPLEMENTARY MATERIALS

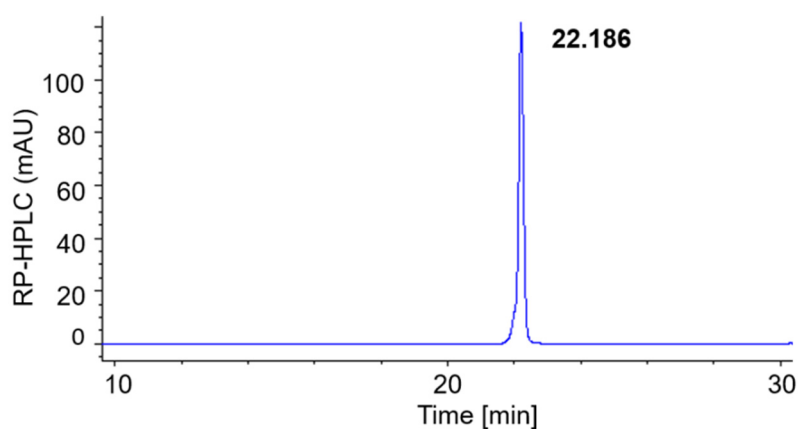

**Figure S1.** Purity analysis of the purified RBD5m by RP-HPLC.

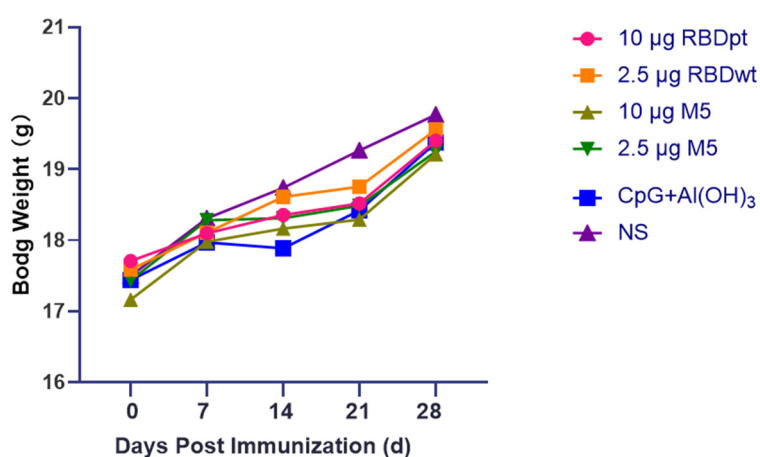

**Figure S2.** Body weight change of mice as a function of days post immunization. The weight of mice was monitored every 7 days after immunization. (n=10).

**Table S1.** Affinity constant of the RBDpt and the RBD5m.

| RBD   | Mean                       |                              |                         |                       |
|-------|----------------------------|------------------------------|-------------------------|-----------------------|
|       | $K_a(10^5 \text{Ms}^{-1})$ | $K_d(10^{-3} \text{s}^{-1})$ | $K_D(10^{-8} \text{M})$ | $\chi^2(\text{RU}^2)$ |
| RBDpt | 4.64                       | 5.79                         | 1.25                    | 0.13                  |
| RBD5m | 4.64                       | 5.79                         | 1.25                    | 0.13                  |

$K_a$ , association rate constant;  $K_d$ , disassociation rate constant;  $K_D$ , equilibrium disassociation constant. All of the values are determined by the ForteBio Octet™ QKe System. (n=1).
